# Supplementary material for: Unraveling the Rat Intestine, Spleen and Liver Genome-Wide Transcriptome after the Oral Administration of Lavender Oil by a Two-Color Dye-Swap DNA Microarray Approach
Source: PLoS One. 2015 Jul 10;10(7):e0129951. doi: 10.1371/journal.pone.0129951 (PMC4498626; doi:10.1371/journal.pone.0129951)
Supplement: S8 Table — (XLSX) [file pone.0129951.s011.xlsx]

## Sheet: SuppTable8
Supporting Information Table 8. Function of rat liver genes up-regulated by LO.
		Symbol	SubCategory Name	Avrage Fold
	Cell Cycle
		Ccnb1	M Phase	1.60983
		Ccnb1	Regulation of the Cell Cycle
		Bcl2	Regulation of the Cell Cycle	1.60104
		Ccnf	Regulation of the Cell Cycle	1.55792
		Ccna2	Regulation of the Cell Cycle	1.50606
	JAK / STAT Signaling Pathway
		Smad5	Transcription Factors or Regulators that Interact with STAT Proteins	1.89067
		Nos2	Genes Induced by STAT Proteins	1.76197
		Nos2	Cell Growth and / or Maintenance
		Nos2	Immune Response
		Prlr	JAK and STAT Proteins	1.61378
		Prlr	Apoptosis
		Prlr	Cell Growth and / or Maintenance
		Prlr	Immune Response
	Skeletal Muscle: Myogenesis & Myopathy
		Capn3	Skeletal Muscle Contractility:Dystrophin-Glycoprotein Complex	1.86171
		Capn3	Skeletal Muscle Contractility:Titin Complex
		Nos2	Skeletal Muscle Wasting/Atrophy:Autophagy	1.76197
		Bcl2	Skeletal Myogenesis	1.60104
	Hypertension
		Bmpr2	Vasoconstriction	1.77614
		Slc7a1	Ion Transport	1.62776
		Scnn1g	Ion Transport	1.51008
	Cellular Senescence
		Ccnb1	Senescence Initiators	1.60983
		Tbx3	Senescence Responses	1.51439
		Ccna2	Senescence Initiators	1.50606
	T Cell Activation
		Nos2	T-cell Activation	1.76197
		Prlr	T-cell Activation	1.61378
		Spp1	T-cell Activation	1.45467
	Atherosclerosis
		Bcl2	Apoptosis: Anti-apoptosis	1.60104
		Spp1	Response to Stress: Inflammatory Response	1.45467
		Spp1	Response to Stress: Response to Pests, Pathogens, or Parasites
		Spp1	Apoptosis: Anti-apoptosis
		Spp1	Adhesion Molecules:Cell-matrix Ahesion
		Spp1	Extracellular Molecules: Other Extracellular Molecules
		Spp1	Cell Growth and Proliferation: Growth Factors and Receptors
	Insulin Signaling Pathway
		Irs2	Insulin Receptor-Associated Proteins: Insulin and Receptors	2.46046
		Irs2	Carbohydrate Metabolism: Glucose Metabolism
		Irs2	Cell Growth and Differentiation:Cell Proliferation
		Nos2	MAPK Pathway: Target genes	1.76197
		Nos2	Protein Metabolism:Other Protein Metabolism Genes
		Nos2	Cell Growth and Differentiation:Cell differentiation
	Endothelial Cell Biology
		Nos2	Permissibility and Vessel Tone:NO System	1.76197
		Nos2	Permissibility and Vessel Tone:Oxidoreductase Activity
		Nos2	Endothelial Cell Activation:Other Genes Involved in Cell Growth
		Nos2	Endothelial Cell Injury:Response to Stress
		Bcl2	Endothelial Cell Injury:Anti-Apoptosis	1.60104
	Apoptosis
		Prlr	Anti-Apoptosis	1.61378
		Bcl2	Anti-Apoptosis	1.60104
		Bcl2	Regulation of Apoptosis
		Bcl2	BCL2andBAGDomainProteins
	Cytoskeleton Regulators
		Cttn	Cortical Cytoskeleton	1.95816
		Cttn	Cell Projections
		Cttn	Cell Projections
		Ccnb1	Cell Cycle	1.60983
	Huntington's Disease
		Grin2b	Neurotransmitter Receptors	1.65138
		Grin2b	Dysregulated Processes: Calcium Signaling / Homeostasis
		Zbtb16	Dysregulated Processes: Apoptosis	1.64948
	TGFβ / BMP Signaling Pathway
		Smad5	SMAD	1.89067
		Smad5	Transcription Factors and Regulators
		Bmpr2	Receptors	1.77614
	Th1-Th2-Th3
		Il12rb2	TH1 Cytokines and Related Genes	2.52348
		Spp1	IMMune Cell Activation	1.45467
		Spp1	T-helper 1 Type Immune Response
	Estrogen Receptor Signaling
		Bcl2	Genes Associated with Breast Cancer Prognosis	1.60104
		Bcl2	Genes Associated with the Response to Chemotherapy
		Ccna2	Genes Associated with Breast Cancer Prognosis	1.50606
	Nitric Oxide Signaling Pathway
		Dlgh4	Genes Involved in the Nitric Oxide Signaling Pathway	2.10872
		Nos2	Genes Involved in Nitric Oxide (NO) Biosynthesis	1.76197
		Nos2	Genes Involved in Superoxide Metabolism
	Ubiquitination (Ubiquitylation) Pathway
		Ube2t	Ubiquitin-Conjugating Enzymes (E2)	1.51594
		Ube2t	Ubiquitin-Protein Ligases (E3)
		Ube2c	Ubiquitin-Conjugating Enzymes (E2)	1.43518
	Stem Cell
		Ihh	Stem Cell Specific Markers:Genes Regulating Symmetric/Asymmetric Cell Division	1.62312
		Ccna2	Stem Cell Specific Markers:Cell Cycle Regulators	1.50606
	Inflammasomes
		Map3k7	NOD-Like Receptors	1.78953
		Bcl2	Inflammasomes	1.60104
	Innate and Adaptive Immune Response
		Il12rb2	Host Defense to Bacteria	2.52348
		Nos2	Host Defense to Bacteria	1.76197
	Interferon (IFN) and Receptor
		Il12rb2	Interferon Receptors	2.52348
		Prlr	Interferon Receptors	1.61378
	Stem Cell Signaling
		Smad5	TGFß Superfamily Signaling Pathway	1.89067
		Bmpr2	TGFß Superfamily Signaling Pathway	1.77614
	Cardiotoxicity
		Hspa2	Up-Regulated	1.77006
		Spp1	Up-Regulated	1.45467
	Molecular Toxicology PathwayFinder
		Hspa2	Heat Shock Response	1.77006
		Bcl2	Apoptosis	1.60104
	Telomeres & Telomerase
		Blm	Telomere Maintenance	2.08745
		Bcl2	Telomere Regulation	1.60104
	Synaptic Plasticity
		Grin2b	Long Term Potentiation (LTP)	1.65138
		Grin2b	Cell Adhesion
		Grin2b	CREB Cofactors
		Grin2b	Neuronal Receptors
		Grin2b	Postsynaptic Density
	Glycosylation
		B4galt2	Galactosyltransferases	2.27074
		B4galt2	N-Linked Glycosylation
		B4galt2	Glycosphingolipids
	Multiple Sclerosis
		Bcl2	Apoptosis: Neuronal	1.60104
		Bcl2	Cell Adhesion
		Bcl2	Cellular Stress
	Hedgehog Signaling Pathway
		Ihh	Genes Involved in Hedgehog Signaling Pathway	1.62312
		Ihh	Regulators of Cell Differentiation
		Ihh	Regulators of Development
	Mitochondria
		Bcl2	Membrane Polarization & Potential	1.60104
		Bcl2	Mitochondrial Transport
		Bcl2	Apoptotic Genes
	Adipogenesis
		Irs2	PPAR Gamma Targets	2.46046
		Irs2	Adipogenesis Regulation:Pro-Adipogenesis
	mTOR Signaling
		Pld2	mTOR Upstream Regulators:mTORC1 Positive Regulators	4.08958
		Pld2	Cellular Processes:Lipid Metabolism
	Toll-Like Receptor Signaling Pathway
		Map3k7	Downstream Pathways and Target Genes	1.78953
		Map3k7	Regulation of Adaptive Immunity
	Cell Surface Markers
		Cd38	B-cell Surface Markers	1.89881
		Cd38	T-cell surface markers
	EGF / PDGF Signaling
		Bcl2	Cell Survival and Growth	1.60104
		Bcl2	Response to Stimulus
	Extracellular Matrix and Adhesion Molecules
		Spp1	Cell Adhesion Molecules	1.45467
		Spp1	Extracellular Matrix (ECM) Proteins
	Growth Factor
		Spp1	Apoptosis Regulators	1.45467
		Spp1	Cell Differentiation
	Homeobox (HOX) Genes
		Nkx6-2	Brain & Nervous System Development	1.63806
		Nkx6-2	HOX Genes Involved In Cell Differentiation
	Hypoxia Signaling Pathway
		Nos2	Hemoglobin Complex Associated Genes	1.76197
		Nos2	Protein Metabolism
	T Helper Cell Differentiation
		Il12rb2	Cytokines & Receptors	2.52348
		Il12rb2	Epigenetically Regulated Genes
	Amino Acid Metabolism I
		Nos2	Arginine Metabolism	1.76197
	Diabetes
		Irs2	Signal Transduction	2.46046
	Inflammatory Cytokines & Receptors
		Spp1	Cytokine Genes	1.45467
	Inflammatory Response and Autoimmunity
		Nos2	Inflammatory Response	1.76197
	Oxidative Stress and Antioxidant Defense
		Nos2	Genes Involved in Reactive Oxygen Species (ROS) Metabolism:Other Genes Involved in Superoxide Metabolism	1.76197
	Primary Cilia
		Ihh	Cellular Signaling:Hedgehog	1.62312
	Autophagy
		Bcl2	Regulation of Autophagy:Co-Regulators of Autophagy and Apoptosis	1.60104
	G Protein Coupled Receptors
		Ltb4r	Lipid Messenger Receptors:Leukotriene B4 & Thromboxane Receptors	2.02329
	Th17 for Autoimmunity & Inflammation
		Il12rb2	Cytokine Receptors	2.52348
	Antiviral Response
		Spp1	Toll-Like Receptor Signaling:Downstream Signaling	1.45467
	Cell Death PathwayFinder
		Bcl2	Apoptosis and Autophagy	1.60104
	Cell Motility
		Cttn	Cellular Projections	1.95816
	DNA Repair
		Blm	Double-Strand Break (DSB) Repair	2.08745
	Drug Metabolism
		Nos2	Phase II Metabolizing Enzymes	1.76197
	Heat Shock Proteins
		Hspa2	HSP70 Family Members	1.77006
	Hematopoietic Stem Cells and Hematopoiesis
		Nos2	Cell Differentiation	1.76197
	Necrosis
		Capn3	Potential Necrosis Genes	1.86171
	Nephrotoxicity
		Spp1	Up-Regulated	1.45467
	Neurotrophin and Receptors
		Bcl2	Apoptosis	1.60104
	p53 Signaling Pathway
		Bcl2	Apoptosis	1.60104
	Polycomb & Trithorax Complexes
		Zbtb16	Polycomb Cofactors	1.64948
	Stress&ToxicityPathwayFinder
		Nos2	Inflammation	1.76197
	Transcription Factors
		Smad5	TGFβ/ BMP Signaling Pathway	1.89067
	Tumor Metastasis
		Ela2	Other Genes Involved in Metastasis	1.90216
	Tumor Necrosis Factor (TNF) Ligand and Receptor\n
		Bcl2	Induction of Apoptosis through DR3 and DR4/5 Death Receptors	1.60104
	Unfolded Protein Response
		Hspa2	Unfolded Protein Binding	1.77006
